# Supplementary material for: The Effect of Botulinum Toxin A on Ischemia-Reperfusion Injury in a Rat Model
Source: Hindawi journal article supplement (doi:10.1155/2017/1074178), 2017-01-01

Supplement figure 1

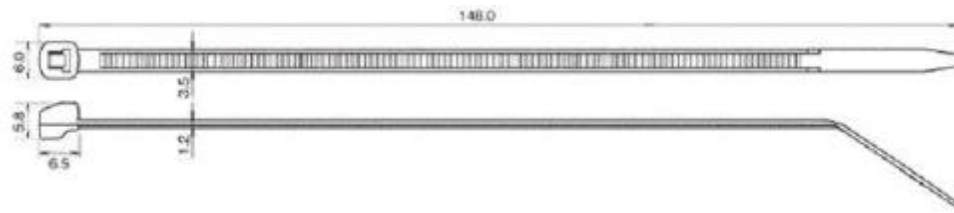

Supplement: f1 [file 1074178.f1.pdf]
